# Supplementary material for: Proximal Binaural Sound Can Induce Subjective Frisson
Source: PubMed Central journal article supplement (PMC7062710; doi:10.3389/fpsyg.2020.00316), 2020-03-03
Supplement: Table_1.pdf [file Table_1.pdf]

**SUPPLEMENTAL TABLE 1** | Distributions of A-weighted sound pressure levels sampled every second for each stimulus. The 5th, 50th, and 95th percentile values of equivalent sound pressure levels are shown for the left and right ears (labeled as LAeq). We also show the maximum levels computed with the “slow” and "fast" time weighting (labeled as LASmax and LAFmax respectively). We confirmed that all the auditory stimuli were below 85 dB for LAeq and LASmax, which is allowed noise level for 8 hours exposure (US Department of Health and Human Services. 1998). For LAFmax, three auditory stimuli exceeded 85 dB but these were less than 90 dB, which is allowed noise level for 2.5 hours exposure.

|          | Sound       | Speed | LAeq |      |      |       |      |      | LASmax |       | LAFmax |       |
|----------|-------------|-------|------|------|------|-------|------|------|--------|-------|--------|-------|
|          |             |       | Left |      |      | Right |      |      | Left   | Right | Left   | Right |
|          |             |       | 5    | 50   | 95   | 5     | 50   | 95   |        |       |        |       |
| Binaural | Beads       | 0     | 70.7 | 71.9 | 72.1 | 67.8  | 71.8 | 72.0 | 75.4   | 75.4  | 79.0   | 79.0  |
|          |             | Low   | 70.9 | 71.9 | 74.3 | 60.8  | 71.4 | 73.0 | 78.4   | 82.0  | 81.9   | 86.9  |
|          |             | High  | 69.1 | 70.5 | 71.0 | 60.7  | 68.8 | 71.1 | 77.0   | 79.1  | 82.5   | 85.0  |
|          | Plastic bag | 0     | 70.4 | 72.8 | 73.0 | 70.1  | 72.4 | 72.6 | 75.0   | 74.8  | 77.0   | 76.7  |
|          |             | Low   | 72.6 | 74.3 | 76.0 | 62.7  | 72.2 | 73.7 | 80.2   | 81.4  | 82.2   | 83.4  |
|          |             | High  | 73.2 | 73.5 | 74.1 | 70.7  | 72.4 | 72.9 | 78.7   | 78.8  | 82.8   | 84.0  |
|          | White noise | 0     | 69.3 | 72.2 | 72.6 | 65.8  | 72.0 | 72.5 | 73.2   | 73.2  | 73.6   | 73.6  |
|          |             | Low   | 73.5 | 74.5 | 76.5 | 64.9  | 71.9 | 73.4 | 80.3   | 80.8  | 81.5   | 83.0  |
|          |             | High  | 72.4 | 73.3 | 73.6 | 68.9  | 71.8 | 72.4 | 77.3   | 77.3  | 80.7   | 81.8  |
|          | Music       | 0     | 59.4 | 65.9 | 68.1 | 59.6  | 66.7 | 69.0 | 72.3   | 73.3  | 74.2   | 75.2  |
|          |             | Low   | 59.7 | 66.8 | 67.9 | 53.1  | 60.8 | 69.3 | 73.3   | 77.1  | 76.7   | 80.0  |
|          |             | High  | 60.5 | 65.0 | 67.4 | 53.2  | 65.4 | 67.0 | 75.1   | 74.7  | 78.6   | 78.2  |
| Monaural | Beads       | 0     | 71.7 | 72.2 | 72.5 | 67.0  | 71.9 | 72.0 | 75.5   | 75.3  | 79.2   | 78.8  |
|          |             | Low   | 71.4 | 74.0 | 75.1 | 69.5  | 72.4 | 73.4 | 82.1   | 80.8  | 87.0   | 85.6  |
|          |             | High  | 71.6 | 72.8 | 73.8 | 67.5  | 70.6 | 71.9 | 79.6   | 78.2  | 85.3   | 83.9  |
|          | Plastic bag | 0     | 70.8 | 73.1 | 73.4 | 69.4  | 72.3 | 72.5 | 75.3   | 74.6  | 77.2   | 76.5  |
|          |             | Low   | 73.4 | 76.6 | 77.6 | 70.7  | 73.7 | 74.5 | 84.2   | 81.0  | 86.1   | 83.0  |
|          |             | High  | 75.9 | 76.3 | 76.7 | 72.3  | 73.4 | 73.7 | 81.6   | 78.5  | 86.3   | 83.5  |
|          | White noise | 0     | 69.5 | 72.5 | 72.9 | 68.6  | 71.9 | 72.3 | 73.6   | 72.9  | 74.0   | 73.3  |
|          |             | Low   | 74.2 | 76.5 | 77.5 | 71.2  | 73.5 | 74.3 | 83.5   | 80.4  | 85.3   | 82.6  |
|          |             | High  | 75.0 | 76.1 | 76.3 | 71.4  | 73.2 | 73.5 | 80.2   | 77.1  | 84.3   | 81.3  |
|          | Music       | 0     | 59.6 | 66.4 | 68.7 | 59.3  | 66.2 | 68.5 | 72.9   | 72.8  | 74.8   | 74.7  |
|          |             | Low   | 57.1 | 66.6 | 69.5 | 55.8  | 66.4 | 69.4 | 76.0   | 76.1  | 78.5   | 78.5  |
|          |             | High  | 61.5 | 67.1 | 69.0 | 59.6  | 66.4 | 68.4 | 74.4   | 74.0  | 77.2   | 76.6  |
