# Supplementary material for: Proximal Binaural Sound Can Induce Subjective Frisson
Source: PubMed Central journal article supplement (PMC7062710; doi:10.3389/fpsyg.2020.00316), 2020-03-03
Supplement: Table_2.pdf [file Table_2.pdf]

**SUPPLEMENTAL TABLE 2** | Results of correlation analysis between subjective frisson rating and psychological assessment (State-Trait Anxiety Inventory-JYZ: STAI and UPPS-P Impulsive Behavior Inventory in Japanese). A significant correlation was not found between these parameters.

| Personality trait measures | Music stimuli |         | Noise Stimuli |         |
|----------------------------|---------------|---------|---------------|---------|
|                            | coefficient   | p value | coefficient   | p value |
| Premeditation (lack of)    | 0.09          | 0.7     | 0.24          | 0.31    |
| Urgency                    | 0.03          | 0.9     | -0.08         | 0.74    |
| Sensation Seeking          | 0.10          | 0.67    | 0.03          | 0.89    |
| Perservance (lack of)      | 0.32          | 0.18    | -0.15         | 0.55    |
| STAI (State)               | 0.13          | 0.59    | -0.35         | 0.14    |
| STAI (Trait)               | 0.19          | 0.44    | -0.28         | 0.25    |
